# Supplementary material
Source: PubMed Central journal article supplement (PMC4948190)
Supplement: NIHMS798845-supplement-supplementary_data.pdf [file NIHMS798845-supplement-supplementary_data.pdf]

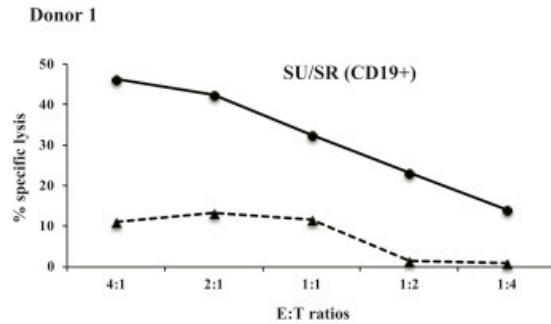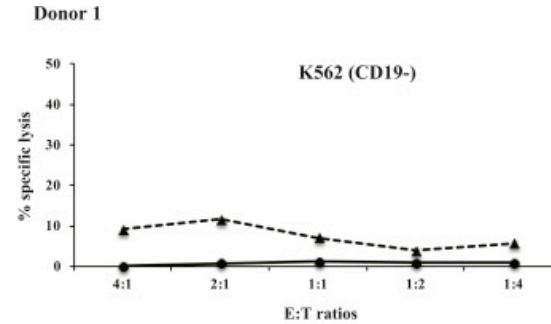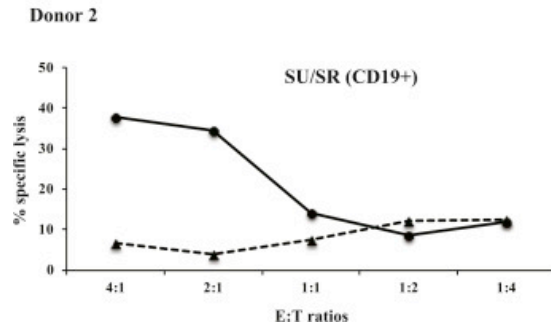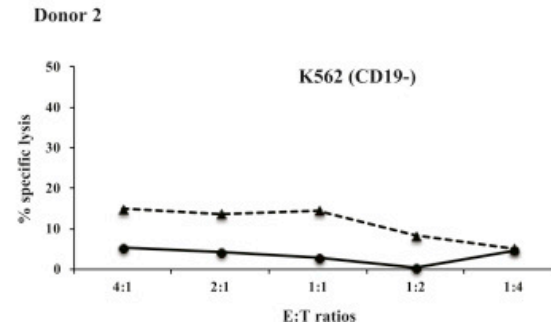

Supplementary Figure S1. Specific lysis of Ph+ALL cells by CAR T cells. To determine if CAR T cells were able to lyse target cells, we performed a 4-hour cytotoxicity assay LDH release assay. As targets, we used CD19-positive Ph+ALL (SU/SR) cells and CD19-nega...

Shoji Saito, Yoza Nakazawa, Akane Sueki, Kazuyuki Matsuda, Miyuki Tanaka, Ryu Yanagisawa, Yasuhiro Maeda, Yuko Sato, Seiichi Okabe, Takeshi Inukai, Kanji Sugita, Matthew H. Wilson, Cliona M. Rooney, Kenichi Koike

**Anti-leukemic potency of piggyBac-mediated CD19-specific T cells against refractory Philadelphia chromosome-positive acute lymphoblastic leukemia**

Cytotherapy, Volume 16, Issue 9, 2014, 1257–1269

<http://dx.doi.org/10.1016/j.jcyt.2014.05.022>

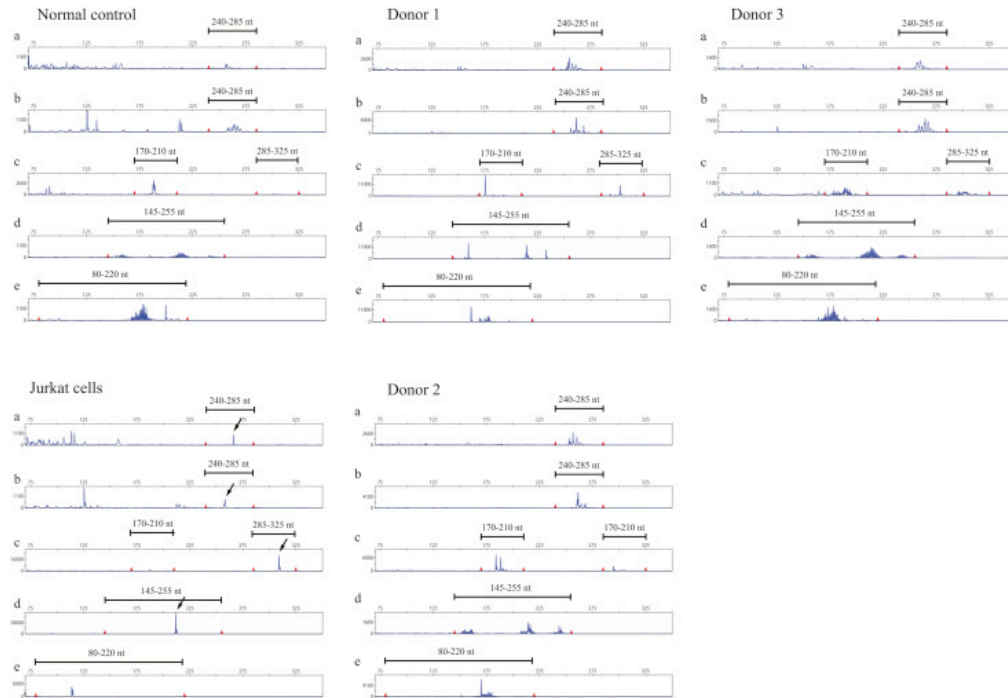

Supplementary Figure S2. Analysis of TCR gene rearrangement in generated CD19-specific CAR T cells. TCR- $\beta$  and TCR- $\gamma$  genes were analyzed in CAR T cells generated from three donors to detect the clonal T-cell growth by BIOMED-2 multiplex-PCR consisting of three ...

Shoji Saito, Yoza Nakazawa, Akane Sueki, Kazuyuki Matsuda, Miyuki Tanaka, Ryu Yanagisawa, Yasuhiro Maeda, Yuko Sato, Seiichi Okabe, Takeshi Inukai, Kanji Sugita, Matthew H. Wilson, Cliona M. Rooney, Kenichi Koike

**Anti-leukemic potency of piggyBac-mediated CD19-specific T cells against refractory Philadelphia chromosome-positive acute lymphoblastic leukemia**

Cytotherapy, Volume 16, Issue 9, 2014, 1257–1269

<http://dx.doi.org/10.1016/j.jcyt.2014.05.022>

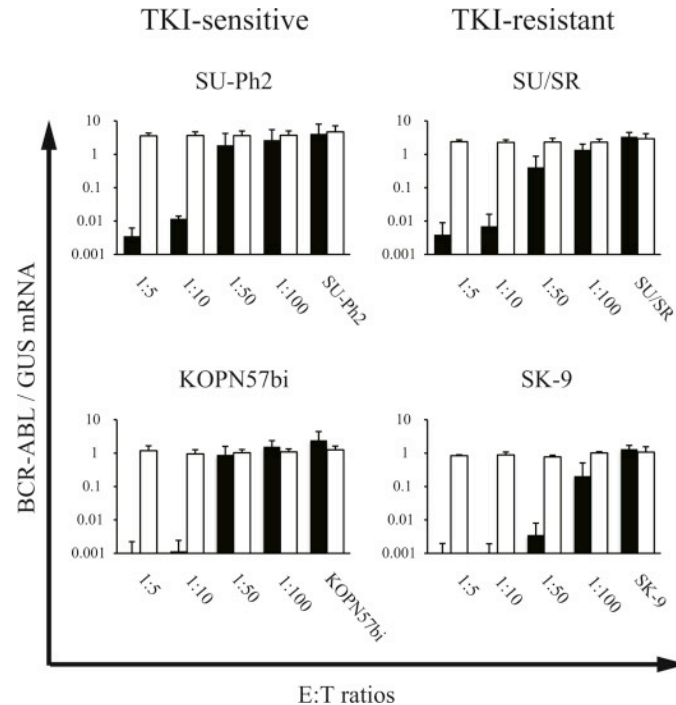

Supplementary Figure S3. Anti-leukemic activity of CD19-specific CAR T cells against Ph+ALL cells determined by qPCR. Either of CAR T cells (closed bars) or mock T cells (open bars) were co-cultured with  $1 \times 10^5$  Ph+ALL cells (SU-Ph2, KOPN57bi, SU/SR or SK-9) a...

Shoji Saito, Yozo Nakazawa, Akane Sueki, Kazuyuki Matsuda, Miyuki Tanaka, Ryu Yanagisawa, Yasuhiro Maeda, Yuko Sato, Seiichi Okabe, Takeshi Inukai, Kanji Sugita, Matthew H. Wilson, Cliona M. Rooney, Kenichi Koike

**Anti-leukemic potency of piggyBac-mediated CD19-specific T cells against refractory Philadelphia chromosome-positive acute lymphoblastic leukemia**

Cytotherapy, Volume 16, Issue 9, 2014, 1257–1269

<http://dx.doi.org/10.1016/j.jcyt.2014.05.022>
